# Supplementary material
Source: publisher site journal article supplement (https://www.kjim.org/upload/media/kjim-2022-401-Supplementary-Fig-2.pdf)
Supplement: Supplementary file 1 [file kjim-2022-401-Supplementary-Fig-2.pdf]

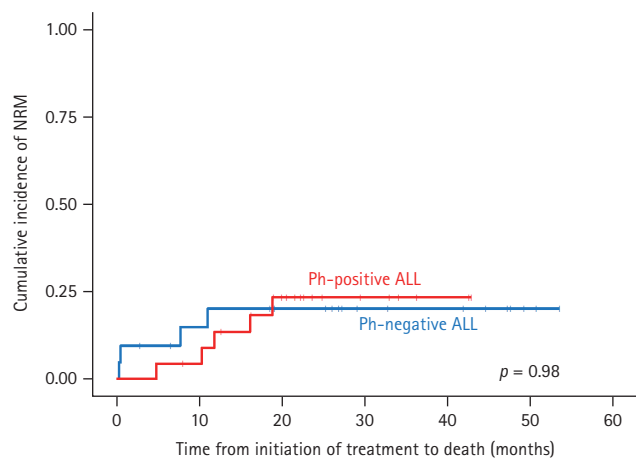

**Supplementary Figure 2.** Cumulative incidence of non-relapse mortality (NRM). There were no statistically significant differences in NRM between patients with Ph-negative or Ph-positive ALL. Ph, Philadelphia; ALL, acute lymphoblastic leukemia.
